# Supplementary material
Source: Springer Nature journal article supplement (https://www.springermedizin.de/resource/supplementary/13045_2009_72_MOESM1_ESM.pdf/9660598)

# Growth Factors

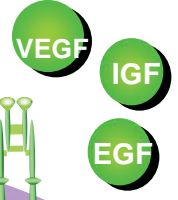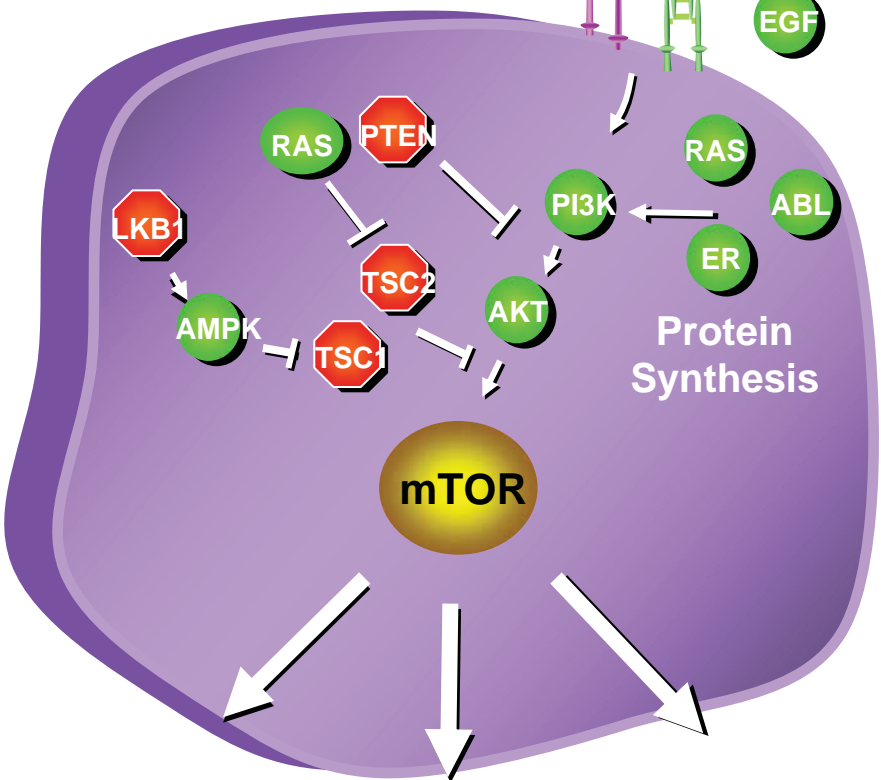

**Cell Growth & Proliferation**

**Angiogenesis**

**Cell Metabolism**

Supplement: MOESM1 [file 9660598]
